# Supplementary material
Source: PubMed Central journal article supplement (PMC7072036)
Supplement: NIHMS1569454-supplement-8.pdf [file NIHMS1569454-supplement-8.pdf]

**Table S1. Genotypes of Flies in Each Experiment, Related to STAR Methods**

| Figure          | Genotype                                                                                                                                                                                                                                                               |
|-----------------|------------------------------------------------------------------------------------------------------------------------------------------------------------------------------------------------------------------------------------------------------------------------|
| <b>Figure 1</b> |                                                                                                                                                                                                                                                                        |
| B               | <i>VT033006-GAL4/UAS-CD4-GFP</i>                                                                                                                                                                                                                                       |
| C               | <i>UAS-HRP-CD2/+</i>                                                                                                                                                                                                                                                   |
| D               | <i>UAS-HRP-CD2/+; VT033006-GAL4/+</i>                                                                                                                                                                                                                                  |
| E               | <i>-HRP: UAS-HRP-CD2/+</i><br><i>+HRP: UAS-HRP-CD2/+; VT033006-GAL4/+</i>                                                                                                                                                                                              |
| F               | <i>-HRP: UAS-HRP-CD2/+</i><br><i>+HRP: UAS-HRP-CD2/+; VT033006-GAL4/+</i>                                                                                                                                                                                              |
| <b>Figure 2</b> |                                                                                                                                                                                                                                                                        |
| B               | <i>-HRP: UAS-HRP-CD2/+</i><br><i>+HRP: UAS-HRP-CD2/+; VT033006-GAL4/+</i>                                                                                                                                                                                              |
| <b>Figure 4</b> |                                                                                                                                                                                                                                                                        |
| C               | <i>C155-GAL4, UAS-dcr2/+ (or Y); GMR86C10-LexA, LexAop-mtdTomato, Or98a-mCD8-GFP, Or92a-rCD2/+</i>                                                                                                                                                                     |
| D               | <i>C155-GAL4, UAS-dcr2/+ (or Y); GMR86C10-LexA, LexAop-mtdTomato, Or98a-mCD8-GFP, Or92a-rCD2/UAS-CG6821-RNAi (BDSC_ BL55389)</i>                                                                                                                                       |
| E               | <i>C155-GAL4, UAS-dcr2/+ (or Y); GMR86C10-LexA, LexAop-mtdTomato, Or98a-mCD8-GFP, Or92a-rCD2/UAS-CG31998-RNAi (VDRC_100417)</i><br><i>C155-GAL4, UAS-dcr2/+ (or Y); GMR86C10-LexA, LexAop-mtdTomato, Or98a-mCD8-GFP, Or92a-rCD2/+; UAS-CG17839-RNAi (VDRC_ 3109)/+</i> |
| F               | <i>C155-GAL4, UAS-dcr2/+ (or Y); GMR86C10-LexA, LexAop-mtdTomato, Or98a-mCD8-GFP, Or92a-rCD2/+; UAS-CG33087-RNAi (BDSC_ 31151)/+</i><br><i>C155-GAL4, UAS-dcr2/+ (or Y); GMR86C10-LexA, LexAop-mtdTomato, Or98a-mCD8-GFP, Or92a-rCD2/UAS-CG9796-RNAi (BDSC_ 67832)</i> |
| <b>Figure 5</b> |                                                                                                                                                                                                                                                                        |
| C               | <i>LRP1 conditional tag/+</i>                                                                                                                                                                                                                                          |
| D               | <i>LRP1 conditional tag/+</i>                                                                                                                                                                                                                                          |
| E               | <i>eyFLP/+ (or Y); LRP1 conditional tag/+</i>                                                                                                                                                                                                                          |
| F               | <i>eyFLP/+ (or Y); LRP1 conditional tag/+</i>                                                                                                                                                                                                                          |
| G               | <i>LRP1 conditional tag/UAS-FLP; VT033006-GAL4/+</i>                                                                                                                                                                                                                   |
| H               | <i>LRP1 conditional tag/UAS-FLP; VT033006-GAL4/+</i>                                                                                                                                                                                                                   |
| I               | Control: <i>UAS-dcr2/+ (or Y); GMR86C10-LexA, LexAop-mtdTomato, Or98a-mCD8-GFP, Or92a-rCD2/+; VT033006-GAL4/+</i><br><i>LRP1-RNAi: UAS-dcr2/+ (or Y); GMR86C10-LexA, LexAop-mtdTomato, Or98a-mCD8-GFP, Or92a-rCD2/+; VT033006-GAL4/UAS-LRP1-RNAi (BDSC_ 31151)</i>     |
| J               | Control: <i>hsFLP, UAS-CD8-GFP/+ (or Y); FRT42D, tubP-GAL80/FRT42D; GMR86C10-GAL4/+</i><br><i>LRP1 mutant: hsFLP, UAS-CD8-GFP/+ (or Y); FRT42D, tubP-GAL80/FRT42D, LRP1<sup>-</sup>; GMR86C10-GAL4/+</i>                                                               |
| K               | Control: <i>UAS-dcr2/+ (or Y); Mz19-GAL4, UAS-CD8-GFP/+</i><br><i>LRP1-RNAi: UAS-dcr2/+ (or Y); Mz19-GAL4, UAS-CD8-GFP/+; UAS-LRP1-RNAi (BDSC_ 31151)/+</i>                                                                                                            |
| L               | Control: <i>hsFLP, UAS-CD8-GFP/+ (or Y); Mz19-GAL4, FRT42D, tubP-GAL80/FRT42D</i><br><i>LRP1 mutant: hsFLP, UAS-CD8-GFP/+ (or Y); Mz19-GAL4, FRT42D, tubP-GAL80/FRT42D, LRP1<sup>-</sup></i>                                                                           |
| M               | Control: <i>hsFLP, UAS-CD8-GFP/+ (or Y); Mz19-GAL4, FRT42D, tubP-GAL80/FRT42D</i><br><i>LRP1 mutant: hsFLP, UAS-CD8-GFP/+ (or Y); Mz19-GAL4, FRT42D, tubP-GAL80/FRT42D, LRP1<sup>-</sup></i>                                                                           |

|                  |                                                                                                                                                                                                                                                                                                                                                                       |
|------------------|-----------------------------------------------------------------------------------------------------------------------------------------------------------------------------------------------------------------------------------------------------------------------------------------------------------------------------------------------------------------------|
| <b>Figure S1</b> |                                                                                                                                                                                                                                                                                                                                                                       |
| <b>B</b>         | <i>UAS-HRP-CD2/+</i>                                                                                                                                                                                                                                                                                                                                                  |
| <b>C</b>         | <i>UAS-HRP-CD2/+; VT033006-GAL4/+</i>                                                                                                                                                                                                                                                                                                                                 |
| <b>Figure S4</b> |                                                                                                                                                                                                                                                                                                                                                                       |
|                  | To label PNs for FACS and RNA-sequencing: <i>UAS-CD8-GFP/+; VT033006-GAL4/+</i>                                                                                                                                                                                                                                                                                       |
| <b>Figure S5</b> |                                                                                                                                                                                                                                                                                                                                                                       |
|                  | <i>C155-GAL4, UAS-dcr2/+ (or Y); GMR86C10-LexA, LexAop-mtdTomato, Or98a-mCD8-GFP, Or92a-rCD2/+</i><br>with a single-copy, heterozygous <i>UAS-RNAi</i> on the 2 <sup>nd</sup> or 3 <sup>rd</sup> chromosome (RNAi number listed next to each panel)                                                                                                                   |
|                  | In the two cases that pan-neuronal RNAi was lethal, <i>PN-GAL4</i> was used instead for RNAi expression:<br><i>UAS-dcr2/+ (or Y); GMR86C10-LexA, LexAop-mtdTomato, Or98a-mCD8-GFP, Or92a-rCD2/+; VT033006-GAL4/+</i><br>with a single-copy, heterozygous <i>UAS-RNAi</i> on the 2 <sup>nd</sup> or 3 <sup>rd</sup> chromosome (RNAi number listed next to each panel) |
| <b>Figure S6</b> |                                                                                                                                                                                                                                                                                                                                                                       |
| <b>A</b>         | <i>w<sup>1118</sup></i>                                                                                                                                                                                                                                                                                                                                               |
| <b>B</b>         | <i>LRP1 conditional tag/UAS-FLP; VT033006-GAL4/+</i>                                                                                                                                                                                                                                                                                                                  |
| <b>Figure S7</b> |                                                                                                                                                                                                                                                                                                                                                                       |
| <b>A</b>         | <i>w<sup>1118</sup> or LRP1<sup>-/-</sup></i>                                                                                                                                                                                                                                                                                                                         |
| <b>B</b>         | <i>w<sup>1118</sup> or LRP1<sup>-/-</sup></i>                                                                                                                                                                                                                                                                                                                         |
| <b>D</b>         | Control: <i>Pebbled-GAL4, UAS-dcr2/+ (or Y); GMR86C10-LexA, LexAop-mtdTomato, Or98a-mCD8-GFP, Or92a-rCD2/+</i><br><i>LRP1-RNAi: Pebbled-GAL4, UAS-dcr2/+ (or Y); GMR86C10-LexA, LexAop-mtdTomato, Or98a-mCD8-GFP, Or92a-rCD2/+; UAS-LRP1-RNAi (BDSC_31151)/+</i>                                                                                                      |
| <b>E</b>         | Control: <i>eyFLP, UAS-CD8-GFP/+ (or Y); FRT42D, tubP-GAL80/FRT42D; Or92a-GAL4/+</i><br><i>LRP1 mutant: eyFLP, UAS-CD8-GFP/+ (or Y); FRT42D, tubP-GAL80/FRT42D, LRP1<sup>-/-</sup>; Or92a-GAL4/+</i>                                                                                                                                                                  |
| <b>F</b>         | Control: <i>eyFLP, UAS-CD8-GFP/+ (or Y); FRT42D, tubP-GAL80/FRT42D; Or98a-GAL4/+</i><br><i>LRP1 mutant: eyFLP, UAS-CD8-GFP/+ (or Y); FRT42D, tubP-GAL80/FRT42D, LRP1<sup>-/-</sup>; Or98a-GAL4/+</i>                                                                                                                                                                  |
